# Supplementary material for: Cholesterol Regulates Innate Immunity via Nuclear Hormone Receptor NHR-8
Source: PubMed Central journal article supplement (PMC8571716; doi:10.1016/j.isci.2021.103361), 2021-11-02
Supplement: mmc1.pdf [file mmc1.pdf]

**iScience, Volume 24**

**Supplemental information**

**Cholesterol Regulates Innate Immunity  
via Nuclear Hormone Receptor NHR-8**

**Benson Otarigho and Alejandro Aballay**

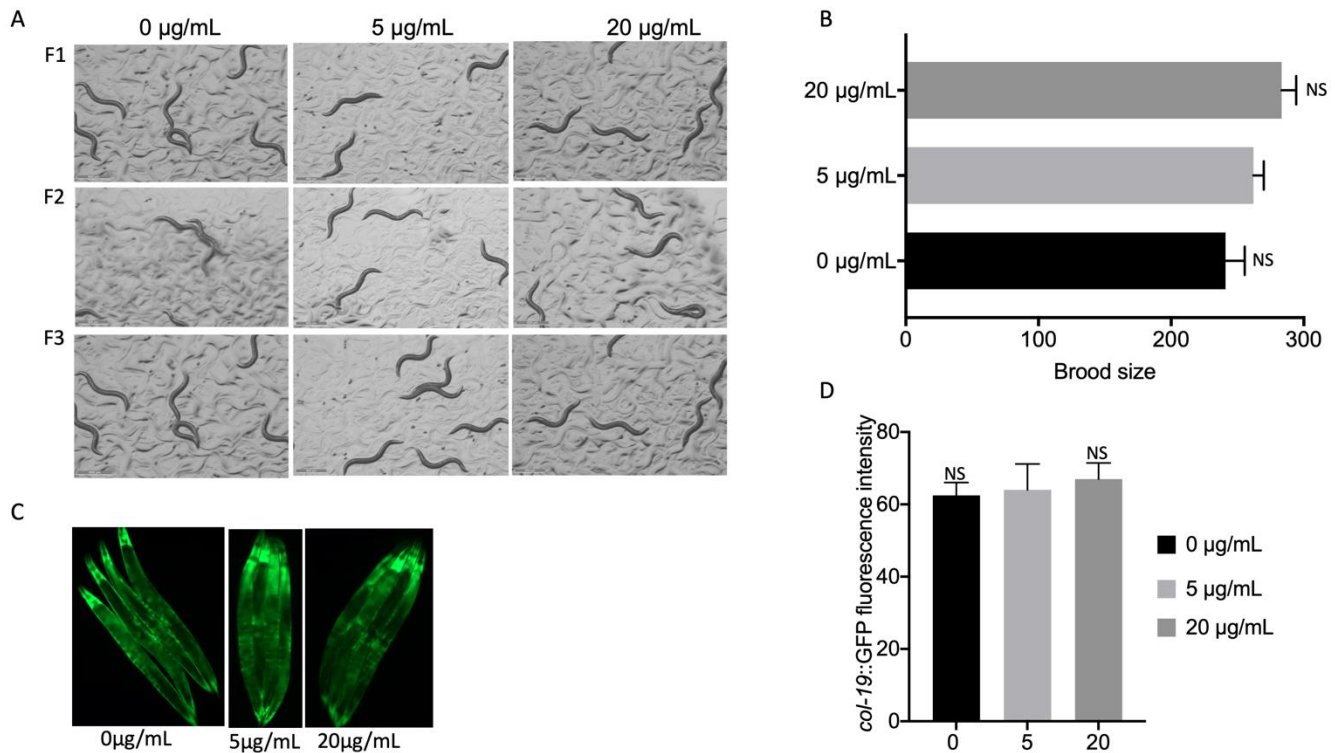

**Figure S1. The absence of cholesterol supplementation does not affect the development or brood size of *C. elegans*. Related to Figure 1.**

(A) Microscopic images of animals grown in the absence and different cholesterol supplementation concentrations for three generations. Microscopic images were obtained at the young adult stage (~65 hours post hatching).

(B) Brood size of animals grown in the absence and different cholesterol concentrations. Bars represent means while error bars indicate SD; P = NS.

(C) Fluorescence images of GR1452 young adult animals (expressing GFP) grown in the absence of cholesterol supplementation and at different cholesterol concentrations. Microscopic images were obtained at the young adult stage (~65 hours post hatching).

(D) Quantification of *col-19::GFP* expression of GR1452 animals grown in the absence of cholesterol supplementation and at different cholesterol concentrations. Fluorescence was quantified using Fiji-ImageJ. Bars represent means while error bars indicate SD; P = NS.

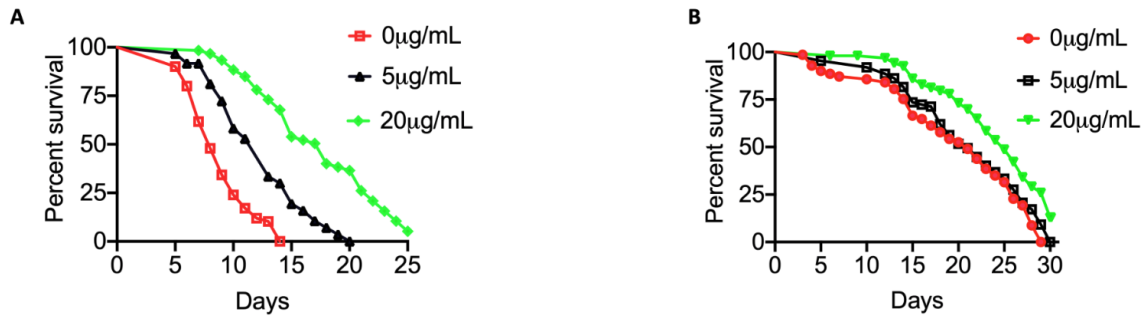

**Figure S2. Lifespan of the *C. elegans* grown on different cholesterol concentrations on live and heat-killed *E. coli*. Related to Figure 1.**

(A) Survival of WT animals grown on *E. coli* at different cholesterol concentrations, transferred to live *E. coli* cultured at the control cholesterol concentration (5 μg/mL), and scored for survival. WT animals on live *E. coli* 5 μg/mL vs. 0 μg/mL,  $P < 0.0001$ ; 20 μg/mL,  $P < 0.0001$ .

(B) Survival of WT animals grown on *E. coli* at different cholesterol concentrations, transferred to heat-killed *E. coli* seeded on plates with control cholesterol concentration (5 μg/mL) and 50 μg/mL streptomycin, and scored for survival. WT animals on heat-killed *E. coli* 5 μg/mL vs. 0 μg/mL,  $P = \text{NS}$ ; 20 μg/mL,  $P < 0.001$ .

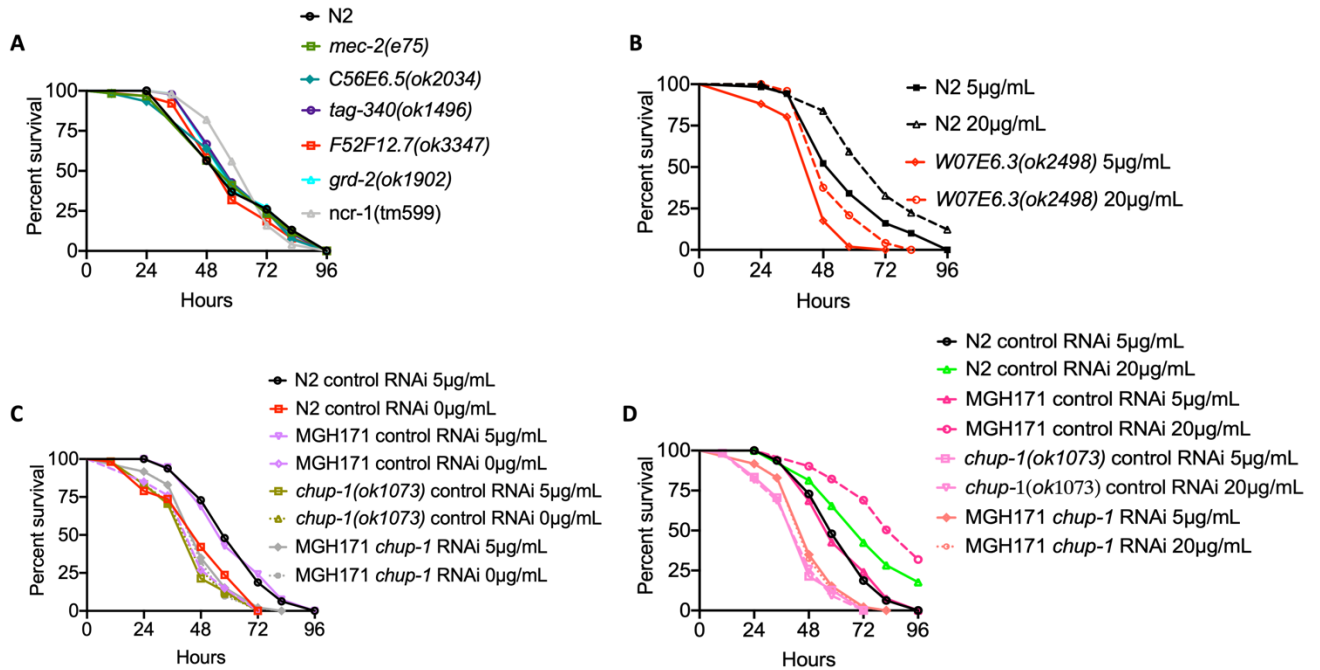

**Figure S3. Survival of animals deficient in cholesterol transporters infected with *P. aeruginosa*. Related to Figure 1.**

(A) WT animals and mutants in cholesterol transporters were grown on 5 μg/mL cholesterol, exposed to *P. aeruginosa*, and scored for survival. WT animal vs. cholesterol transporter loss-of-function animals,  $P = \text{NS}$ .

(B) WT animals and *W07E6.3(ok2498)* were grown on 5 and 20 μg/mL cholesterol, exposed to *P. aeruginosa*, and scored for survival. *W07E6.3(ok2498)* grown on 5 μg/mL cholesterol vs. 20 μg/mL cholesterol,  $P < 0.001$

(C) Control, MGH171(*chup-1* RNAi), WT (*chup-1* RNAi), and *chup-1(ok1073)* RNAi animals were grown on were 0 and 5 μg/mL cholesterol, exposed to *P. aeruginosa*, and scored for survival. MGH171 *chup-1* RNAi grown on 5 μg/mL cholesterol vs. MGH171 *chup-1* RNAi grown on 0 μg/mL,  $P = \text{NS}$ .

(D) Control, MGH171(*chup-1* RNAi), WT (*chup-1* RNAi), and *chup-1(ok1073)* RNAi animals were grown on were 20 and 5 μg/mL cholesterol, exposed to *P. aeruginosa*, and scored for survival. MGH171 *chup-1* RNAi grown on 5 μg/mL cholesterol vs. MGH171 *chup-1* RNAi grown on 20 μg/mL,  $P = \text{NS}$ .

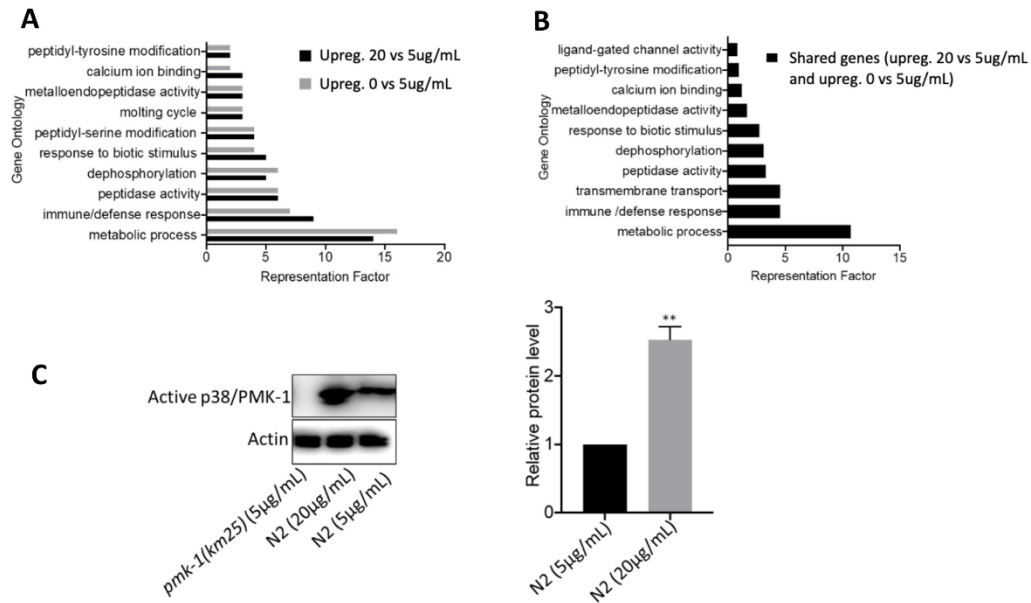

**Figure S4: Analysis of cholesterol genes and active PMK-1/p38 levels. Related to Figures 2 and 4.**

(A) Enrichment analysis of upregulated genes at 20 vs 5 µg/mL and at 0 vs 5 µg/mL cholesterol. The cutoff is based on the filtering thresholds of  $P < 0.05$  and arranged according to the representation factor.

(B) Enrichment analysis of shared genes between animals grown at 20 vs. 5 µg/mL and 0 vs. 5 µg/mL cholesterol. The cutoff is based on the filtering thresholds of  $P < 0.05$  and arranged according to the representation factor.

(C) Western blot analysis of active PMK-1/p38 levels in wild-type animals grown at different cholesterol concentration. Image quantification was performed using the software program Fiji/ImageJ. Bars represent means while error bar indicates SD; \*\* $p < 0.001$

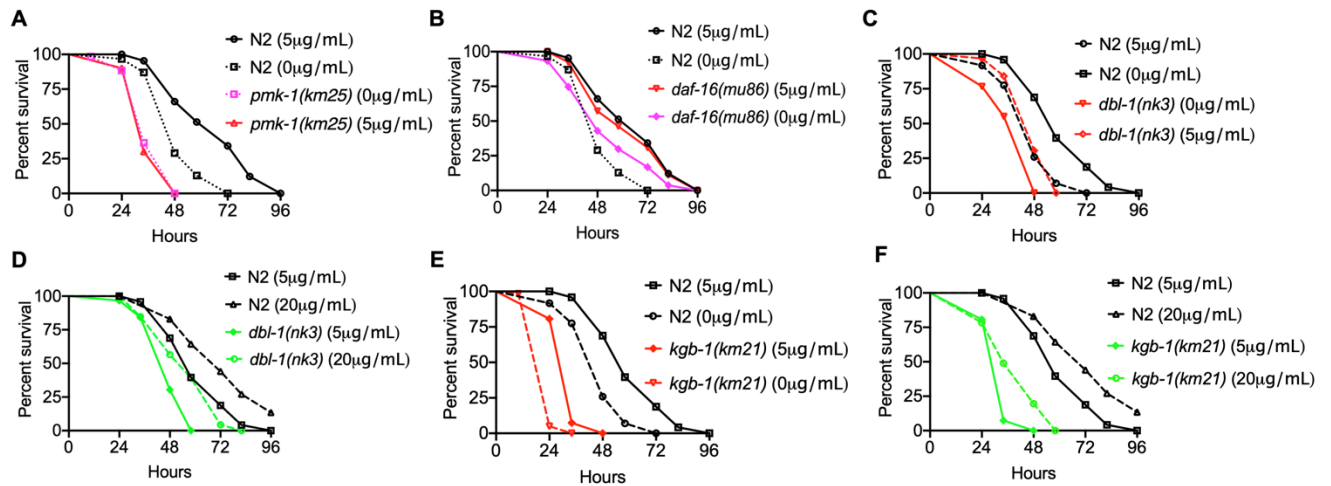

**Figure S5. Survival of mutants in immune genes grown at different cholesterol concentrations. Related to Figure 2.**

(A) WT and *pmk-1(km25)* animals were grown on 0 and 5  $\mu\text{g}/\text{mL}$  cholesterol, exposed to *P. aeruginosa*, and scored for survival. WT animals grown on 5  $\mu\text{g}/\text{mL}$  cholesterol (control) vs. 0  $\mu\text{g}/\text{mL}$ ,  $P < 0.0001$ ; *pmk-1(km25)* 0  $\mu\text{g}/\text{mL}$ ,  $P < 0.0001$ ; *pmk-1(km25)* 5  $\mu\text{g}/\text{mL}$ ,  $P = P > 0.0001$ . *pmk-1(km25)* 0  $\mu\text{g}/\text{mL}$  vs. *pmk-1(km25)* 5  $\mu\text{g}/\text{mL}$ ,  $P = \text{NS}$ .

(B) WT and *daf-16(mu86)* animals were grown on 0 and 5  $\mu\text{g}/\text{mL}$  cholesterol, exposed to *P. aeruginosa*, and scored for survival. WT animals grown on 5  $\mu\text{g}/\text{mL}$  cholesterol (control) vs. 0  $\mu\text{g}/\text{mL}$ ,  $P < 0.0001$ ; *daf-16(mu86)* 0  $\mu\text{g}/\text{mL}$ ,  $P < 0.0001$ ; *daf-16(mu86)* 5  $\mu\text{g}/\text{mL}$ ,  $P = \text{NS}$ .

(C) WT and *dbl-1(nk3)* animals were grown on 0 and 5  $\mu\text{g}/\text{mL}$  cholesterol, exposed to *P. aeruginosa*, and scored for survival. *dbl-1(nk3)* animals grown on 5  $\mu\text{g}/\text{mL}$  cholesterol (control) vs. 0  $\mu\text{g}/\text{mL}$ ,  $P < 0.001$ .

(D) WT and *dbl-1(nk3)* animals were grown on 20 and 5  $\mu\text{g}/\text{mL}$  cholesterol, exposed to *P. aeruginosa*, and scored for survival. *dbl-1(nk3)* animals grown on 5  $\mu\text{g}/\text{mL}$  cholesterol (control) vs. 20,  $P < 0.001$ .

(E) WT and *kgb-1(km21)* animals were grown on 0 and 5  $\mu\text{g}/\text{mL}$  cholesterol, exposed to *P. aeruginosa*, and scored for survival. *kgb-1(km21)* animals grown on 5  $\mu\text{g}/\text{mL}$  cholesterol (control) vs. 0,  $P < 0.001$ .

(F) WT and *kgb-1(km21)* animals were grown on 20 and 5  $\mu\text{g}/\text{mL}$  cholesterol, exposed to *P. aeruginosa*, and scored for survival. *kgb-1(km21)* animals grown on 5  $\mu\text{g}/\text{mL}$  cholesterol (control) vs. 20,  $P < 0.001$ .

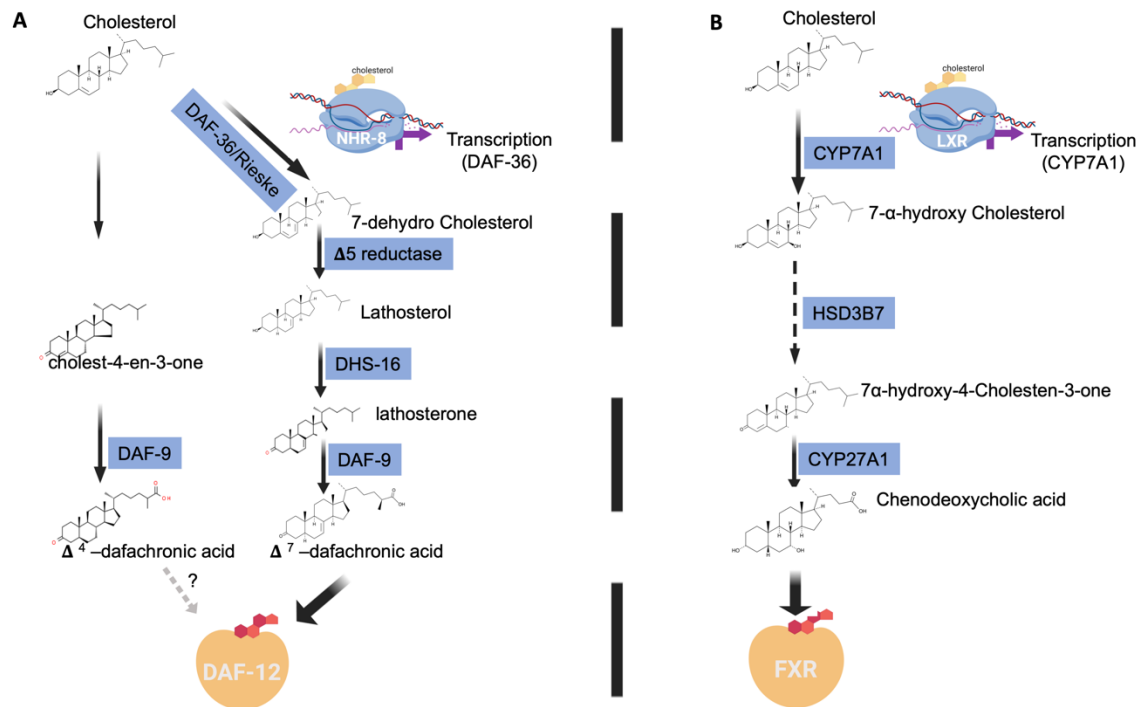

**Figure S6. Diagram of the steroid biosynthesis pathways. Related to Figure 3.**  
 (A) *C. elegans* and (B) mammalian steps and genes are shown purple color.  
 Modified from: Antebi, A., 2015. Nuclear receptor signal transduction in *C. elegans*.  
 WormBook, 1, p.49.

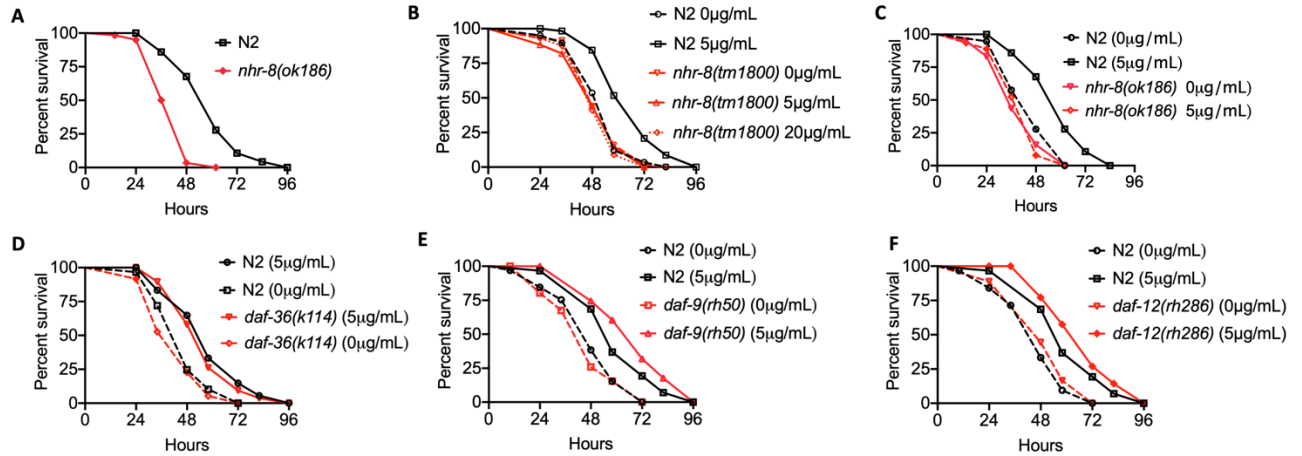

**Figure S7. Survival of mutants in genes required for steroid synthesis grown at different cholesterol concentrations. Related to Figure 3**

(A) WT and *nhr-8(ok186)* animals were grown on 5 μg/mL cholesterol, exposed to *P. aeruginosa*, and scored for survival. WT animals vs. *nhr-8(ok186)*,  $P < 0.0001$ .

(B) WT and *nhr-8(tm1800)* animals were grown on 0, 5 and 20 μg/mL cholesterol supplementation, exposed to *P. aeruginosa*, and scored for survival. WT animals vs. *nhr-8(tm1800)*,  $P < 0.001$ ; *nhr-8(tm1800)* at 5 μg/mL vs. *nhr-8(tm1800)* at 0 μg/mL,  $P = \text{NS}$ ; vs *nhr-8(tm1800)* at 20 μg/mL,  $P = \text{NS}$ .

(C) WT and *nhr-8(ok186)* animals were grown on 0 and 5 μg/mL cholesterol, exposed to *P. aeruginosa*, and scored for survival. WT animals grown on 5 μg/mL cholesterol (control) vs. WT animals 0 μg/mL,  $P < 0.0001$ ; *nhr-8(ok186)* 0 μg/mL,  $P < 0.0001$ ; *nhr-8(ok186)* 5 μg/mL,  $P = \text{NS}$ .

(D) WT and *daf-36(k114)* animals were grown on 0 and 5 μg/mL cholesterol, exposed to *P. aeruginosa*, and scored for survival. WT animals grown on 5 μg/mL cholesterol (control) vs. WT animals 0 μg/mL,  $P < 0.0001$ ; *daf-36(k114)* 0 μg/mL,  $P < 0.0001$ ; *daf-36(k114)* 5 μg/mL,  $P = \text{NS}$ . *daf-36(k114)* animals on 0 μg/mL vs. *daf-36(k114)* 5 μg/mL,  $P < 0.0001$ .

(E) WT and *daf-9(rh50)* animals were grown on 0 and 5 μg/mL cholesterol, exposed to *P. aeruginosa*, and scored for survival. WT animals grown on 5 μg/mL cholesterol (control) vs. WT animals 0 μg/mL,  $P < 0.0001$ ; *daf-9(rh50)* 0 μg/mL,  $P < 0.0001$ ; *daf-9(rh50)* 5 μg/mL,  $P < 0.001$ . *daf-9(rh50)* animals on 0 μg/mL vs. *daf-9(rh50)* 5 μg/mL,  $P < 0.0001$ .

$P < 0.0001$ . *nhr-8(ok186)* animals on 0 μg/mL vs. *nhr-8(ok186)* 5 μg/mL,  $P = \text{NS}$ .

(F) WT and *daf-12(rh286)* animals were grown on 0 and 5 μg/mL cholesterol, exposed to *P. aeruginosa*, and scored for survival. WT animals grown on 5 μg/mL cholesterol (control) vs. WT animals on 0 μg/mL,  $P < 0.0001$ ; *daf-12(rh286)* 0 μg/mL,  $P < 0.0001$ ; *daf-12(rh286)* 5 μg/mL,  $P < 0.001$ . *daf-12(rh286)* mutant on 0 μg/mL vs. *daf-12(rh286)* 5 μg/mL,  $P < 0.0001$ .



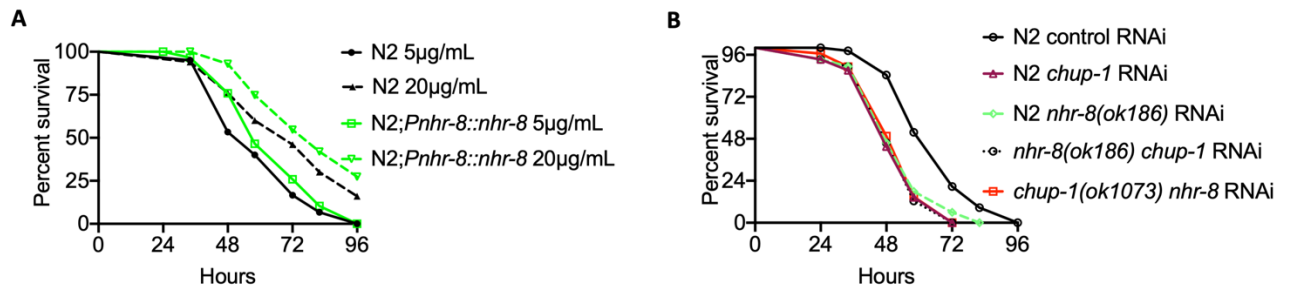

**Figure S8: NHR-8 and CHUP-1 are part of the same pathway that promotes cholesterol-mediated innate immunity . Related to Figure 3**

(A) WT;*Pnhr-8::nhr-8* animals were grown in the absence of cholesterol supplementation and at 5µg/mL cholesterol, exposed to *P. aeruginosa*, and scored for survival. WT animals grown on 20µg/mL cholesterol (control) vs. WT;*Pnhr-8::nhr-8* at 20µg/mL,  $P < 0.001$ .

(B) Control RNAi on WT, *chup-1(ok1013)*, and *nhr-8(186)* alongside with *chup-1* RNAi on *nhr-8(186)* animals were grown on 5 µg/mL cholesterol, exposed to *P. aeruginosa*, and scored for survival. *nhr-8(186)* (*chup-1* RNAi) vs. *chup-1(ok1013)*(control RNAi),  $P = \text{NS}$ ; vs. *nhr-8(186)* (control RNAi),  $P = \text{NS}$ .

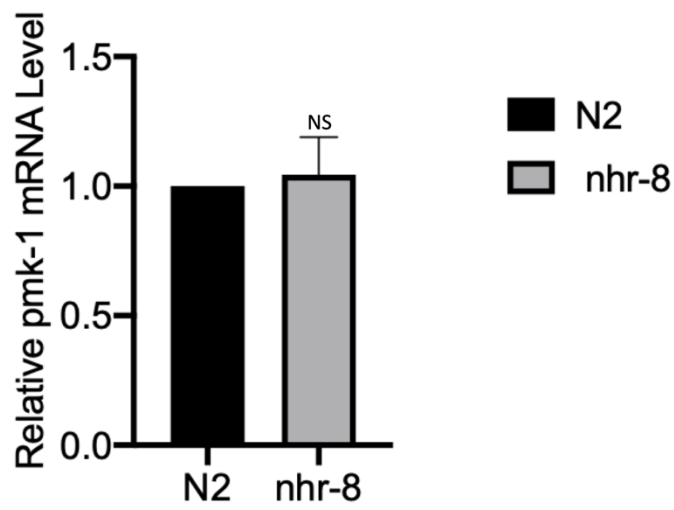

**Figure S9. *pmk-1* expression in N2 and *nhr-8(ok186)* animals. Related to Figure 4.** Gene expression of *pmk-1* in *nhr-8(ok186)* and N2 animals grown on 5  $\mu$ g/mL cholesterol on *E. coli*. Bars represent means while error bar indicates SD; P=NS
